# Supplementary material
Source: ML conference proceedings conference paper supplement (https://openaccess.thecvf.com/content/cvpr_2016/html/Gupta_Synthetic_Data_for_2016_CVPR_paper.html)
Supplement: Supplementary file 1 [file Gupta_Synthetic_Data_for_2016_CVPR_supplemental.pdf]

# Synthetic Data for Text Localisation in Natural Images

## Supplementary Material

Ankush Gupta    Andrea Vedaldi    Andrew Zisserman  
University of Oxford  
`{ankush, vedaldi, az}@robots.ox.ac.uk`

We highlight some components of our synthetic text dataset — *SynthText in the Wild*, and show some sample images from the dataset. Next, we compare the detection results from the “FCRNall multi-flit” method and Jaderberg *et al.* [1] on ICDAR 2013 and Street View Text (SVT) datasets.

## Contents

|                                                           |           |
|-----------------------------------------------------------|-----------|
| Variation in fonts, colors and sizes                      | Section 1 |
| Comparison of alpha-blending with Poisson Image Editing   | Section 2 |
| Sample synthetic images from <i>SynthText in the Wild</i> | Section 3 |
| Detection results on ICDAR 2013                           | Section 4 |
| Detection results on SVT                                  | Section 5 |

## 1 Variation in Fonts, Colors and Sizes

The following images show synthetic text renderings for the same text – “vamos!”.

Along the rows, the text is rendered in approximately the same location and against the same background image but in different fonts, colors and sizes.

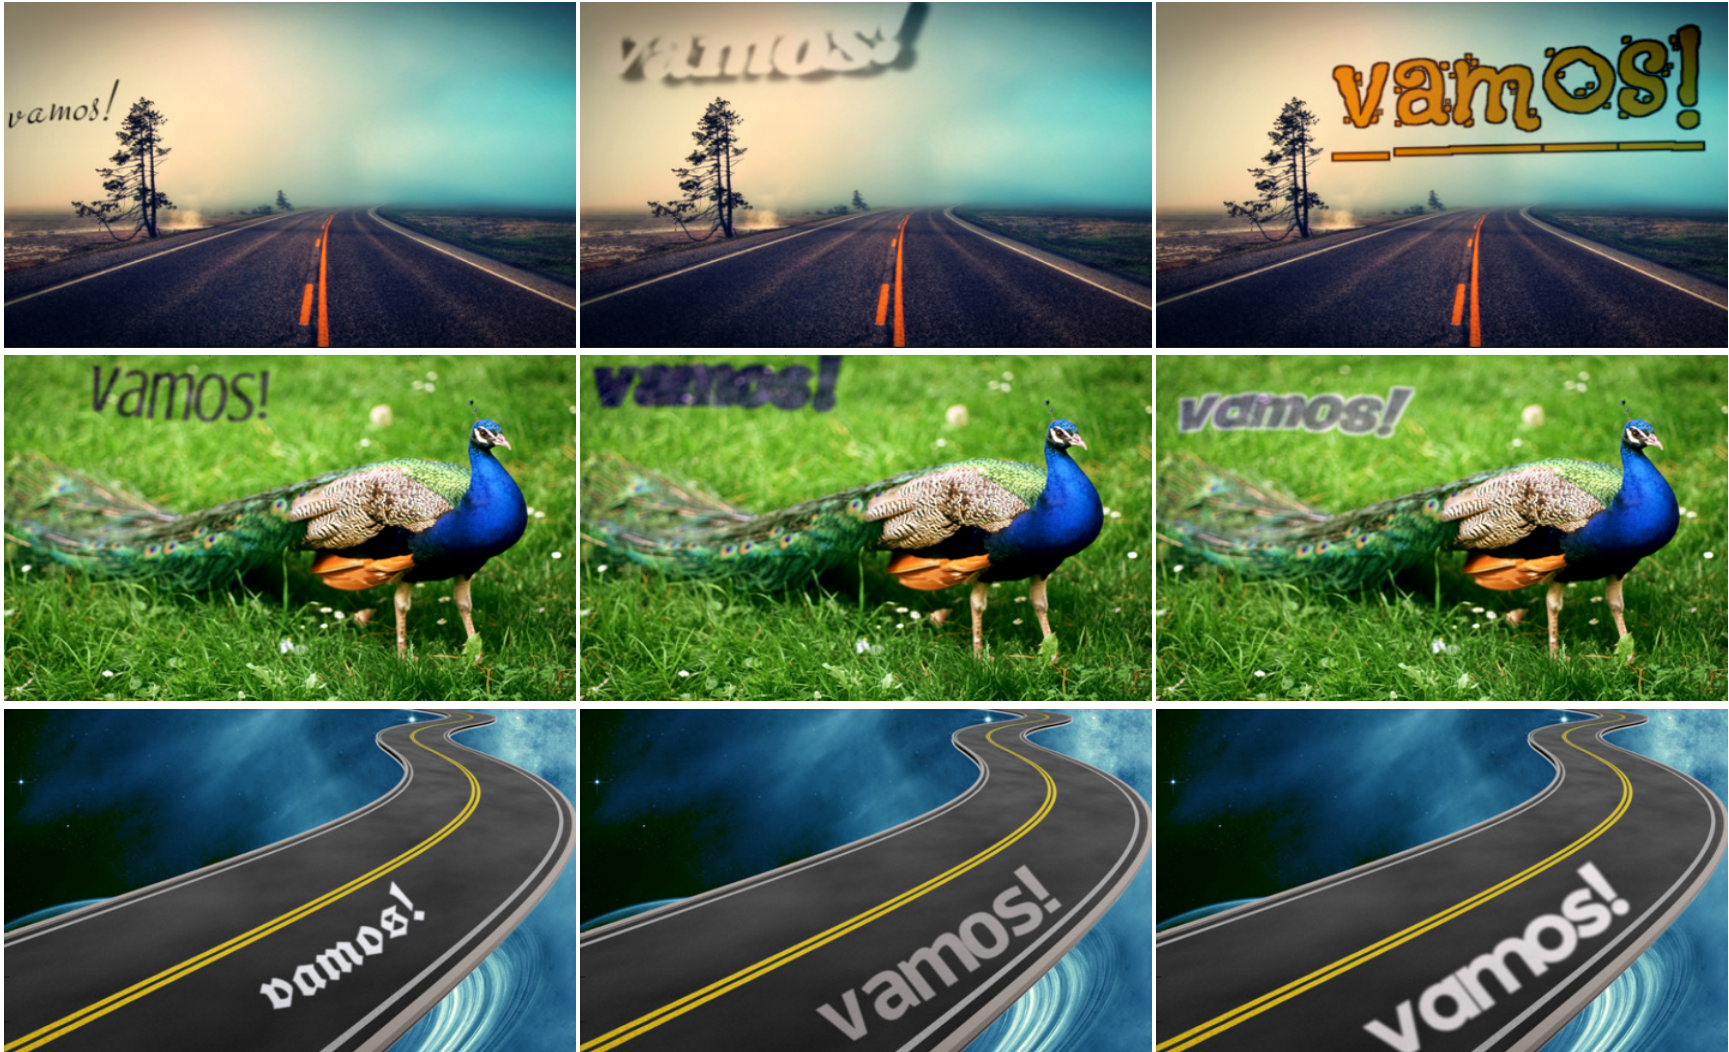

## 2 Poisson Editing vs. Alpha Blending

Comparison between simple alpha blending (**bottom row**) and Poisson Editing [2] (**top row**).

**NOTE:** Poisson Editing preserves local illumination gradient and texture details.

POISSON EDITING

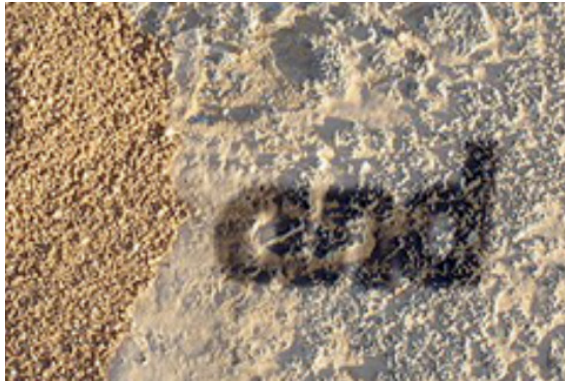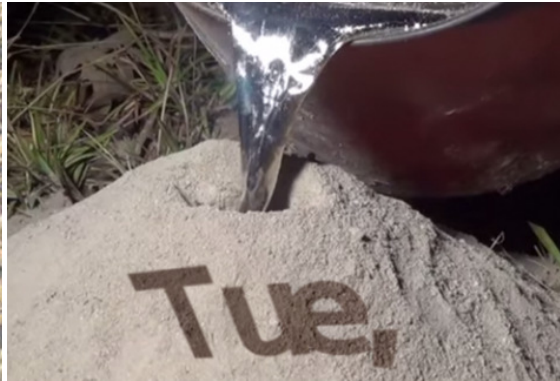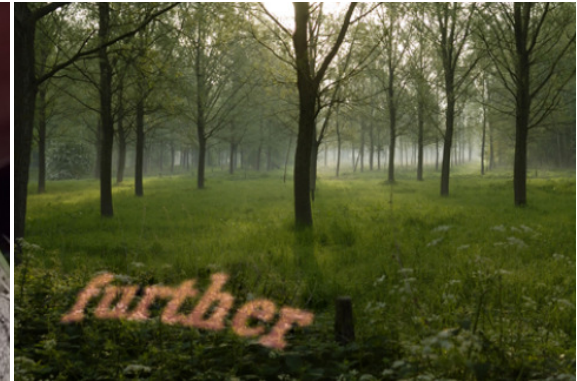

ALPHA BLENDING

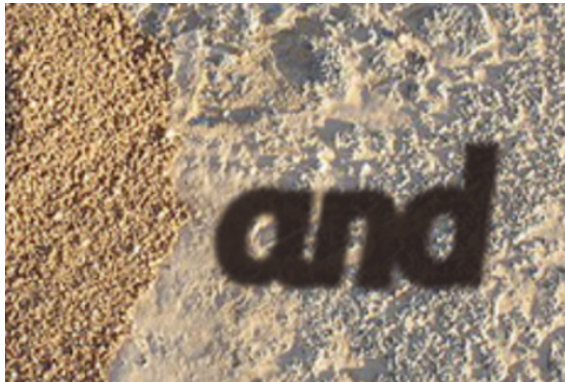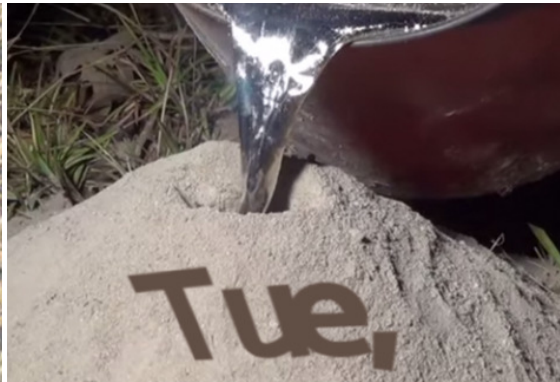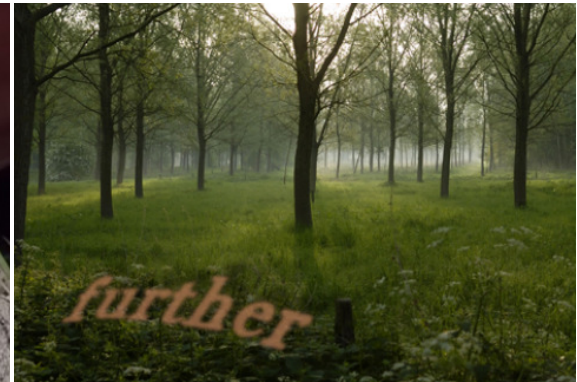



### 3 SynthText in the Wild

Sample images from our synthetic text dataset (continued on the next page).

These images show text instances in various fonts, colors, sizes, with borders and shadows, against different backgrounds, and transformed according to the local geometry and constrained to local contiguous regions of color and text. Ground-truth word bounding-boxes are marked in red.

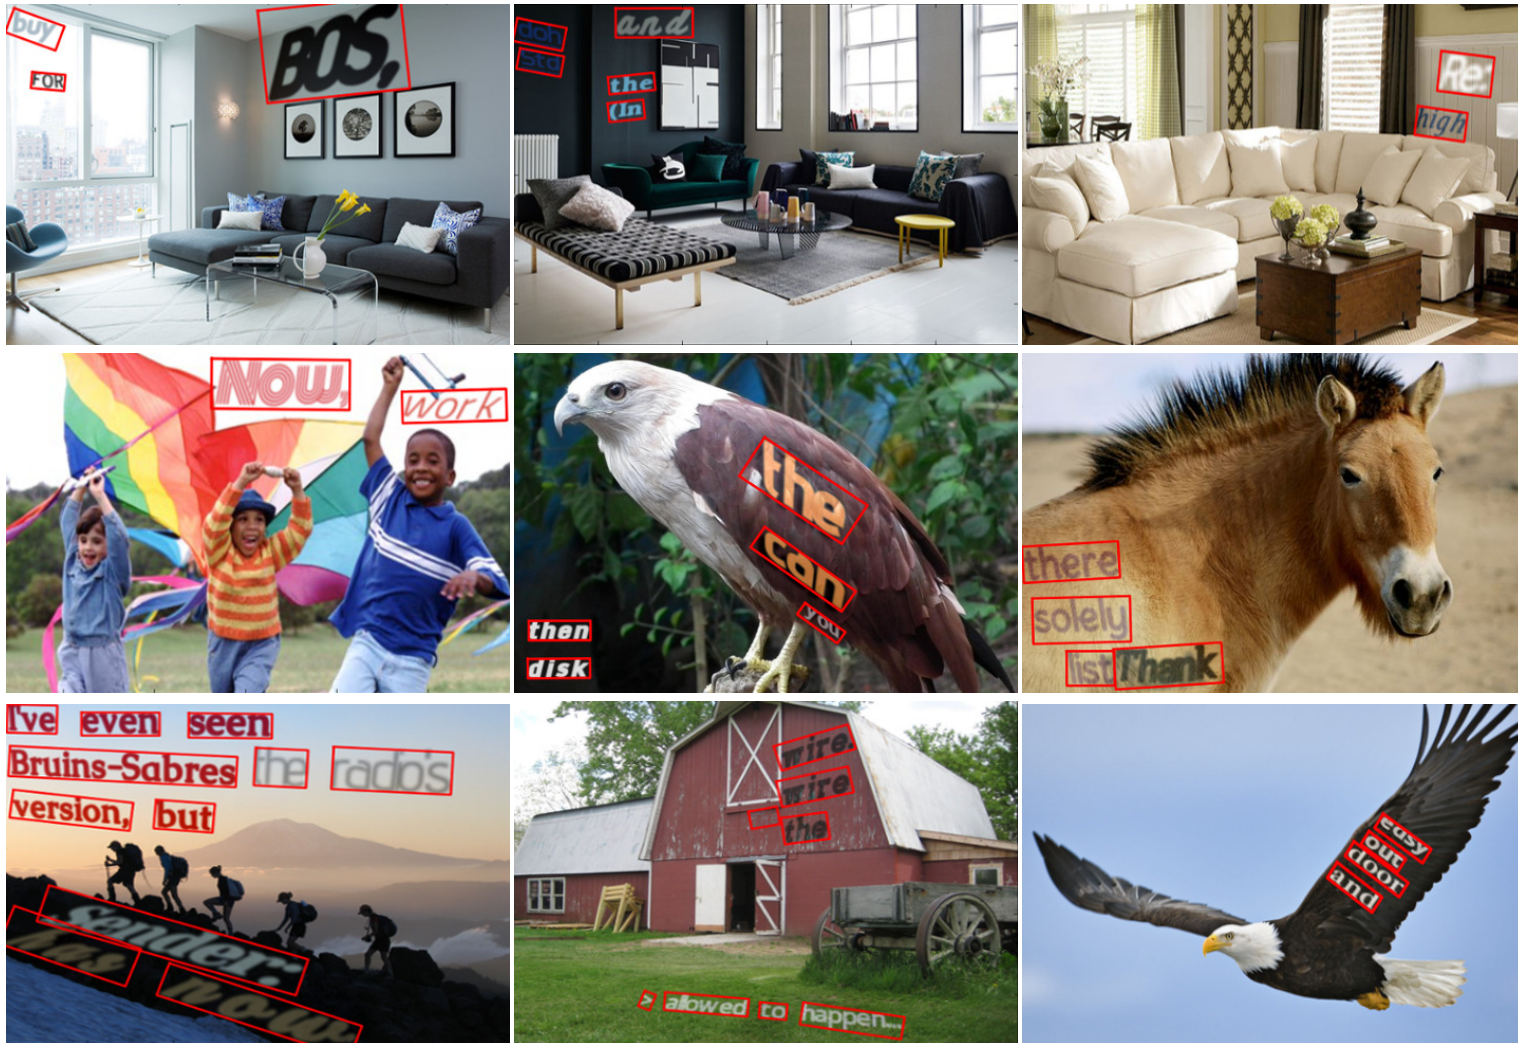



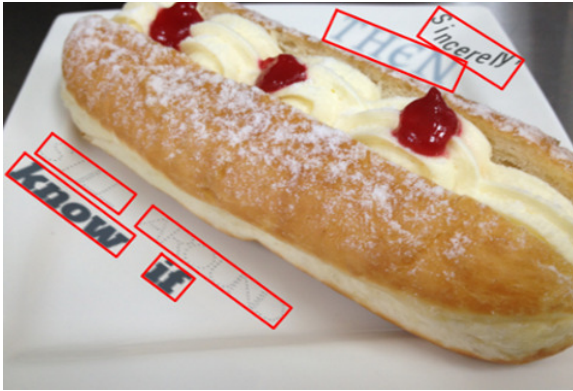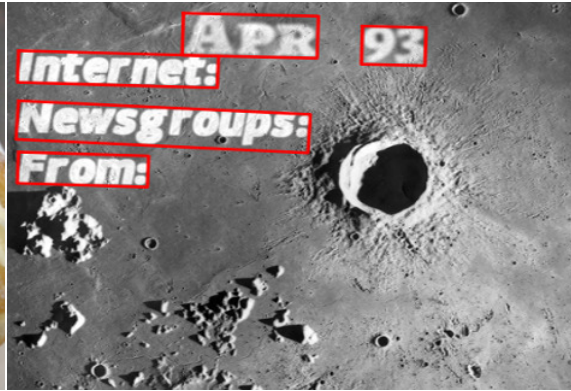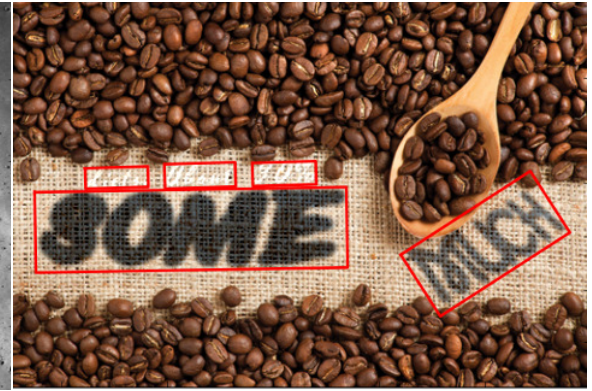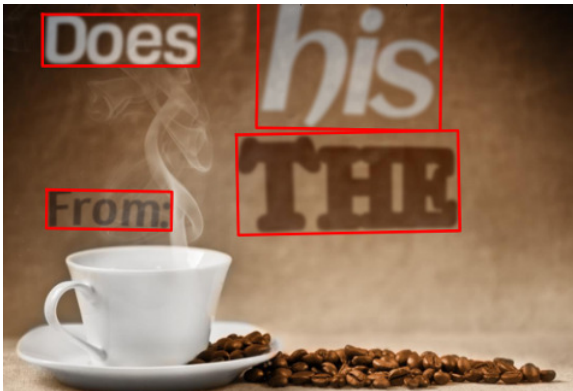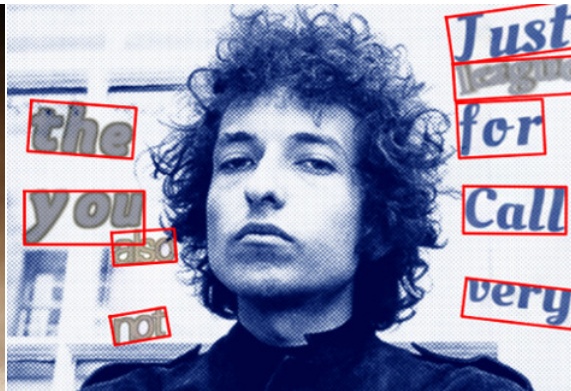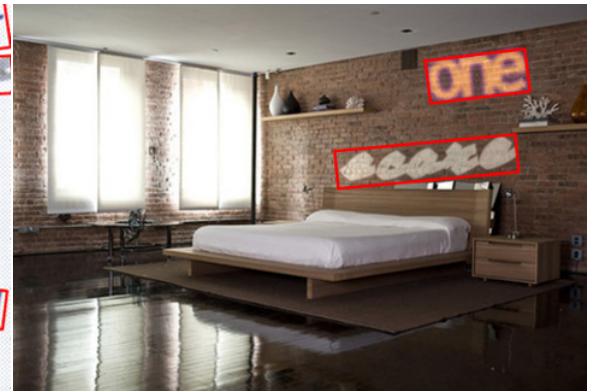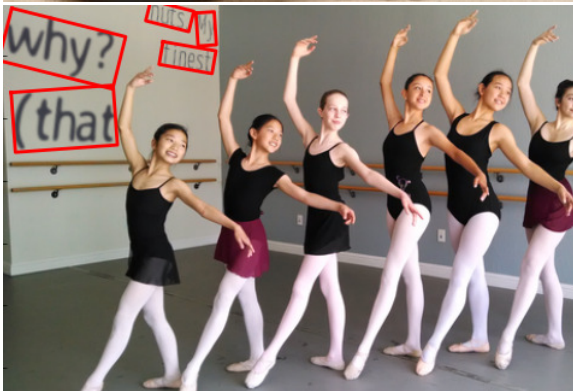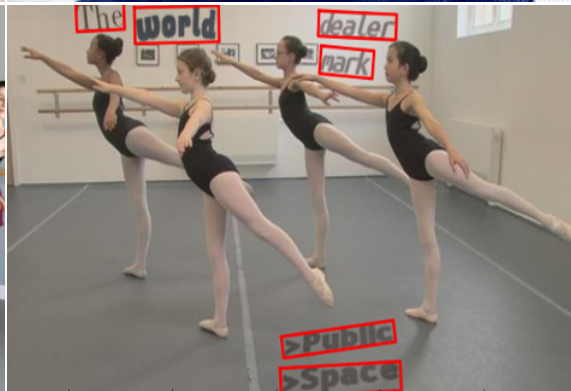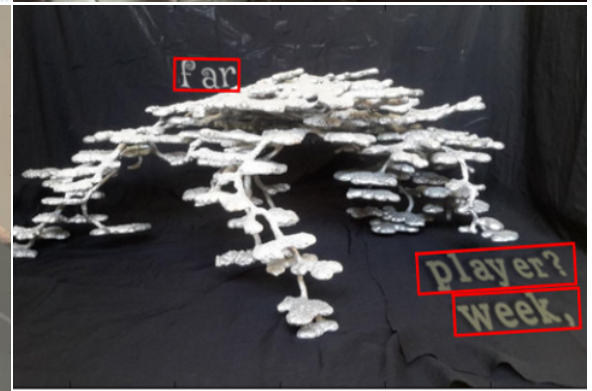



## 4 ICDAR 2013 Detections

Example detections on the ICDAR 2013 dataset from “FCRNall + multi-flit” (**top row**) and those from Jaderberg *et al.* [1] (**bottom row**).

Precision, recall and F-measure values (**P/R/F**) are indicated at the top of each image.

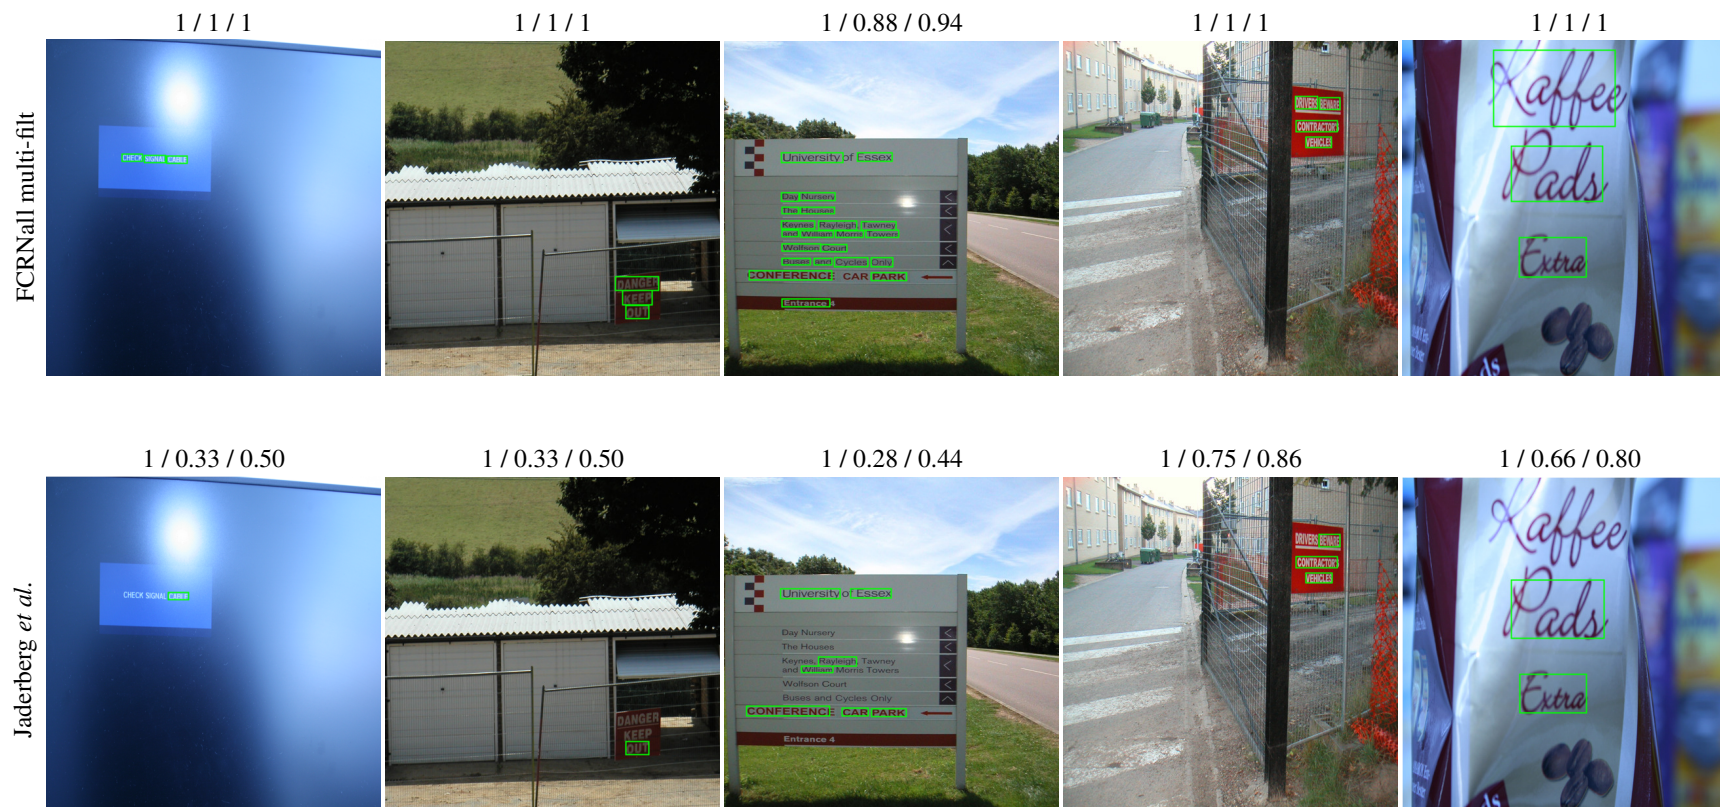

## 5 Street View Text (SVT) Detections

Example detections on the Street View Text (SVT) dataset from “FCRNall + multi-flit” (**top row**) and those from Jaderberg *et al.* [1] (**bottom row**).

Precision, recall and F-measure values (**P/R/F**) are indicated at the top of each image: both the methods have a precision of 1 on these images (except in one case due to missing ground-truth annotation).

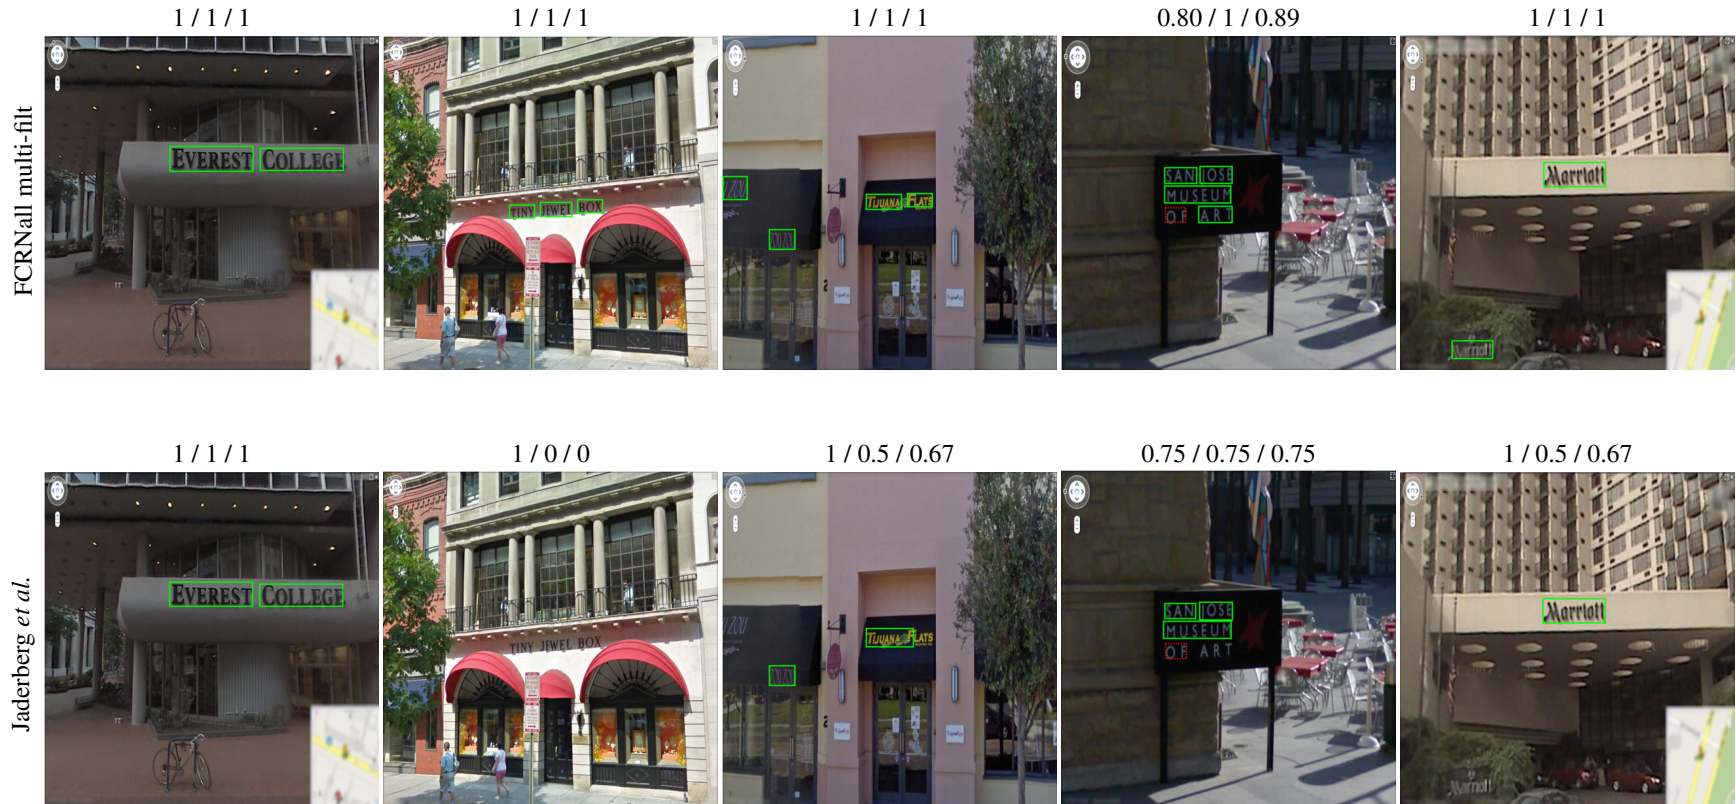

## References

- [1] M. Jaderberg, K. Simonyan, A. Vedaldi, and A. Zisserman. Reading text in the wild with convolutional neural networks. *IJCV*, 2015. 1, 6, 7
- [2] P. Perez, M. Gangnet, and A. Blake. Poisson image editing. *ACM Transactions on Graphics*, 22(3):313–318, 2003. 3
